# Supplementary material for: Omics data integration suggests a potential idiopathic Parkinson’s disease signature
Source: PubMed Central journal article supplement (PMC10662437; doi:10.1038/s42003-023-05548-w), 2023-11-20
Supplement: 42003_2023_5548_MOESM1_ESM.pdf [file 42003_2023_5548_MOESM1_ESM.pdf]

a

| Source of IPSCs   | IPSC ID      | Disease | Age at onset | Age at sampling | Sex    | Corresponding NESC line |
|-------------------|--------------|---------|--------------|-----------------|--------|-------------------------|
| IBBL/MPI Muenster | 2.0.0.70.2.0 | WT      | -            | 65              | Female | CTRL1                   |
| IBBL/MPI Muenster | 2.0.0.72.1.0 | WT      | -            | 63              | Female | CTRL2                   |
| IBBL/MPI Muenster | 2.0.0.71.1.0 | WT      | -            | 68              | Female | CTRL3                   |
| IBBL/MPI Muenster | 2.1.0.67.3.0 | IPD     | 57           | 67              | Female | IPD1                    |
| IBBL/MPI Muenster | 2.1.0.68.2.0 | IPD     | 62           | 67              | Female | IPD2                    |
| IBBL/MPI Muenster | 2.1.0.69.5.0 | IPD     | 60           | 68              | Female | IPD3                    |

b

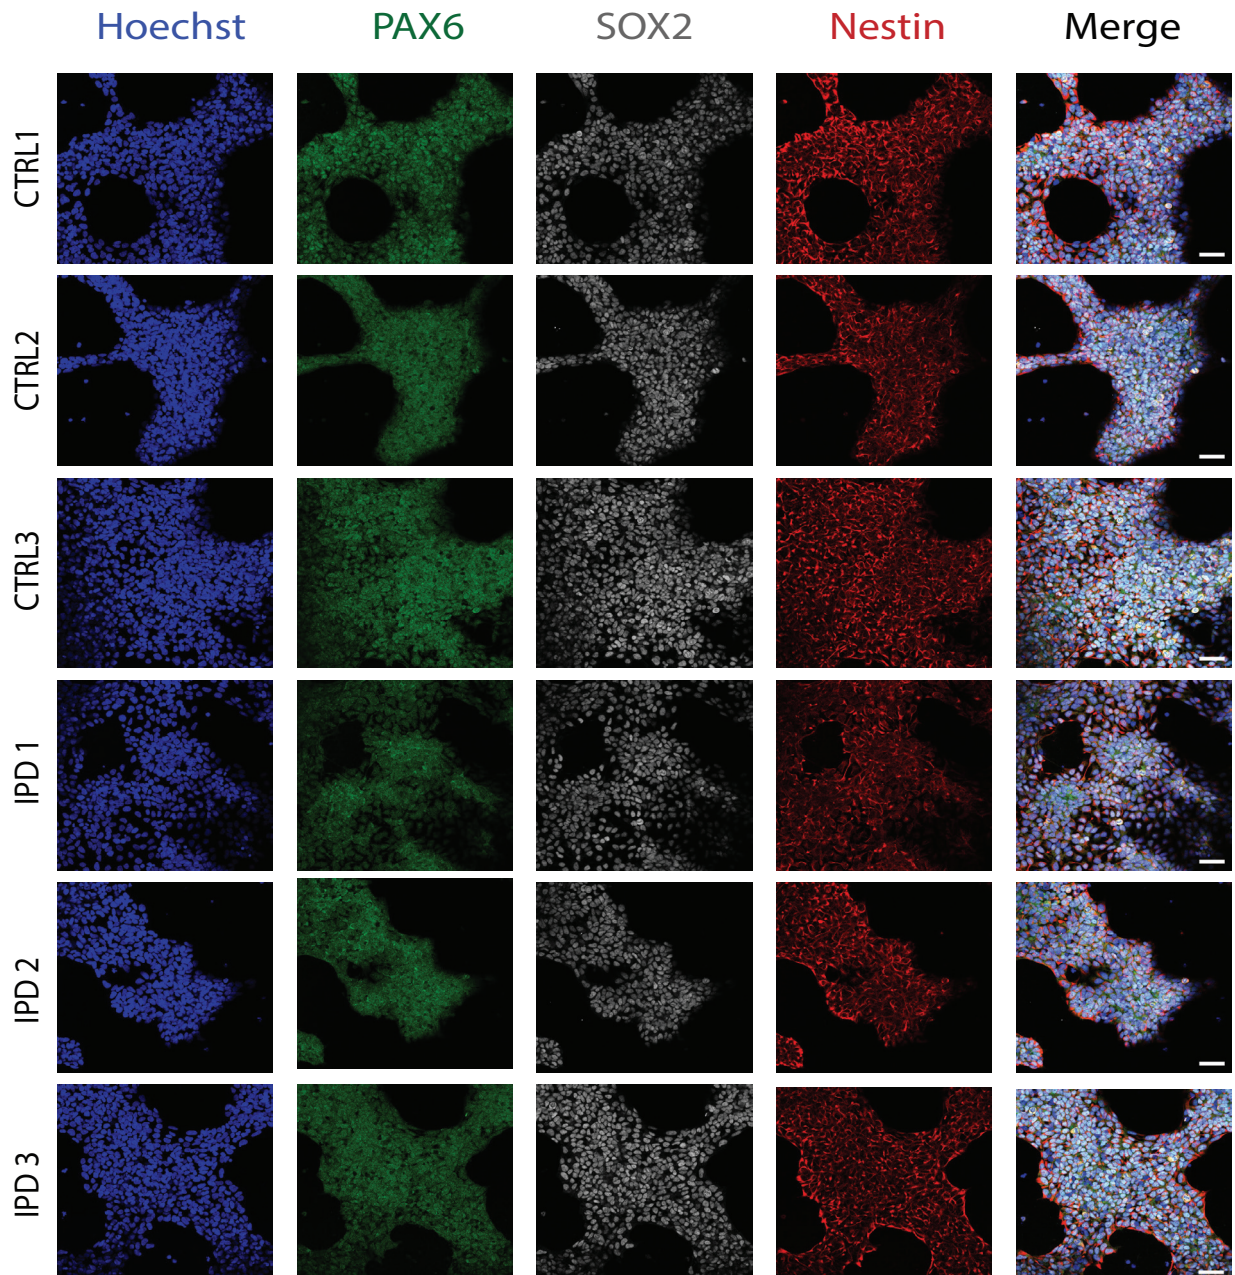

Supplementary Fig. 1. Cell lines used in this study. a) Source of IPSC used to generate NESCs. IBBL: Integrated Biobank of Luxembourg. MPI Muenster: Max Planck Institute in Muenster. b) NESC characterization by immunofluorescent stainings SOX2 (grey), PAX6 (green), Nestin (red). Images acquired with 20x objective, scale bars: 50µm.

a

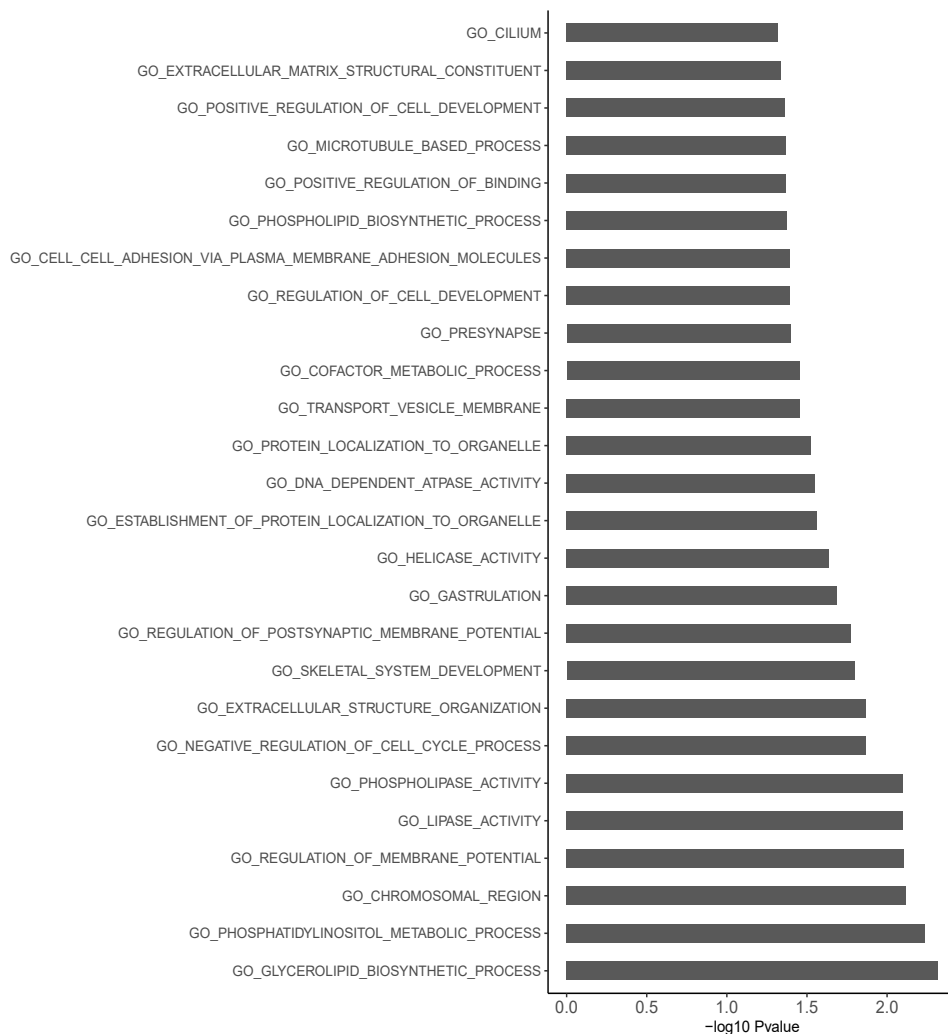

b

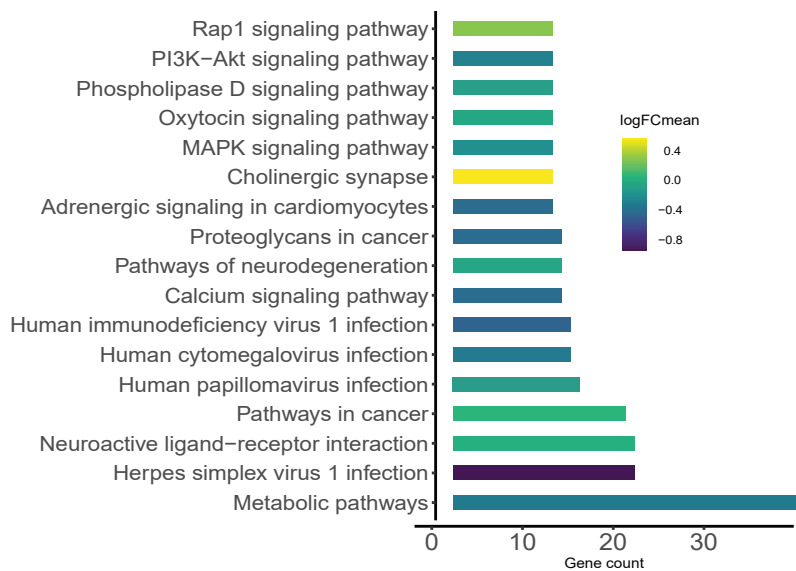

Supplementary Fig. 2. Transcriptomic and metabolic profiles reveal neurodevelopmental and metabolic alterations in IPD neural precursor cells. a) The most significantly enriched GO terms ( $p < 0.05$ ) of DEGs. b) DEG annotation to the KEGG database. The color indicates the average  $\log_2FC$  of the respective genes.

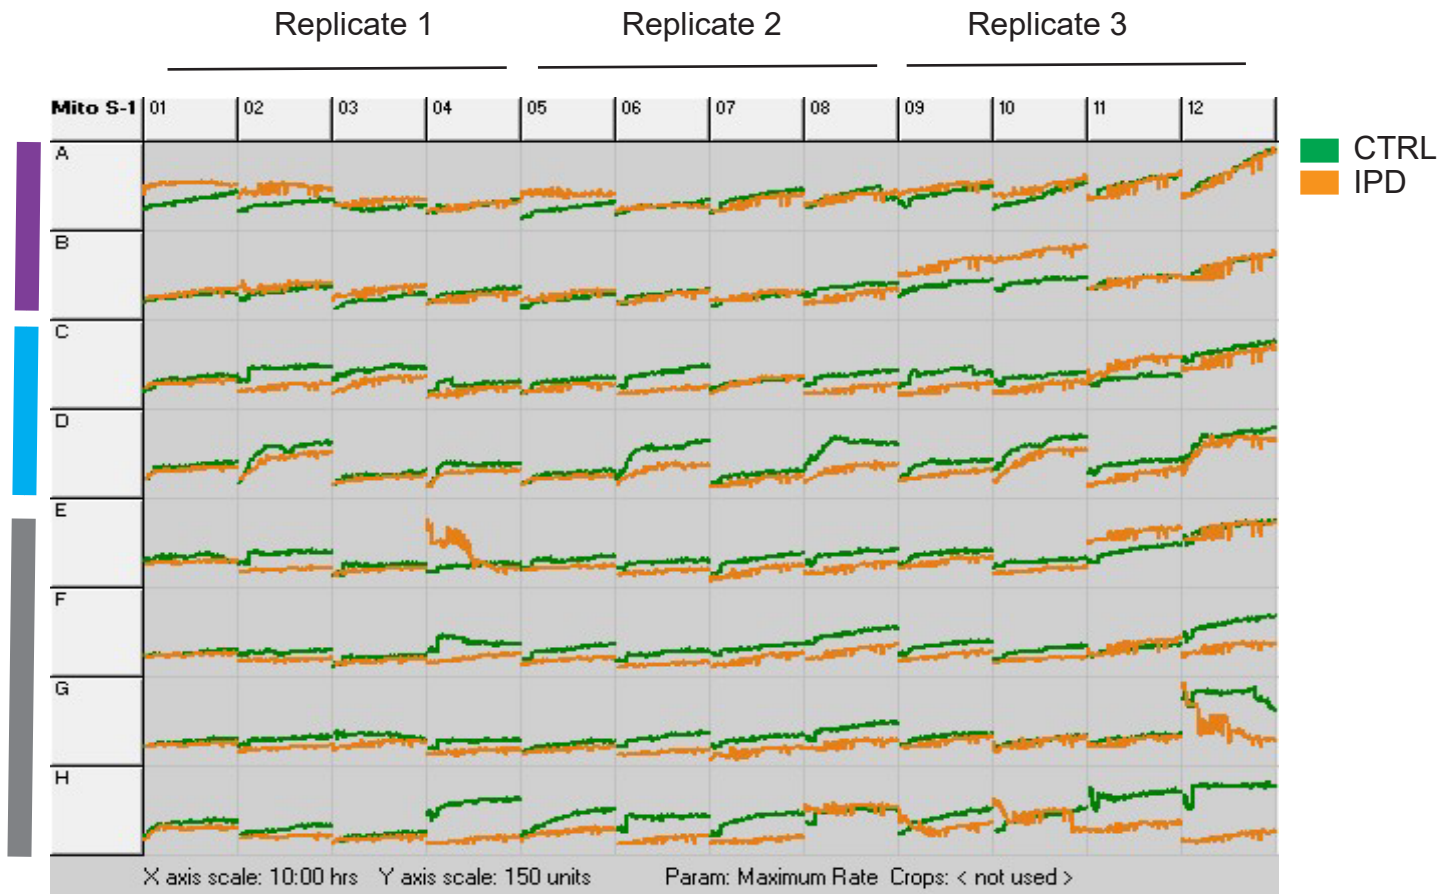

A1; A5; A9: no substrate/blank

**■** Cytoplasmic substrates

A2; A6; A10:  $\alpha$ -D-Glucose  
 A3; A7; A11: Glycogen  
 A4; A8; A12: D-Glucose-1-PO4  
 B1; B4; B9: D-Glucose-6-PO4  
 B2; B6; B10: D-gluconate-6-PO4  
 B3; B7; B11: D,L-alpha-Glycerol-PO4  
 B4; B8; B12: L-Lactic Acid

**■** TCA cycle substrates

C1; C5; C9: Pyruvic acid  
 C2; C6; C10: Citric Acid  
 C3; C7; C11: D,L-Isocitric Acid  
 C4; C8; C12: cis-Aconitic Acid  
 D1; D5; D9:  $\alpha$ -Keto-Glutaric Acid  
 D2; D6; D10: Succinic Acid  
 D3; D7; D11: Fumaric Acid  
 D4; D8; D12: L-Malic Acid

**■** Other mitochondrial substrates

E1; E5; E9:  $\alpha$ -Keto-Butyric Acid  
 E2; E6; E10: D,L- $\beta$ -Hydroxy Butyric Acid  
 E3; E7; E11: L-Glutamic Acid  
 E4; E8; E12: L-Glutamine  
 F1; F5; F9: Analyl-Glutamine  
 F2; F6; F10: L-Serine  
 F3; F7; F11: L-Ornithine  
 F4; F8; F12: Tryptamine  
 G1; G5; G9: 100 $\mu$ M L-Malic Acid  
 G2; G6; G10: Acetyl L-Carnitine + 100 $\mu$ M L-Malic Acid  
 G3; G7; G11: Octanoyl-L-Carnitine + 100  $\mu$ M L-Malic Acid  
 G4; G8; G12: Palmitoyl-D,L-Carnitine + 100  $\mu$ M L-Malic Acid  
 H1; H5; H9: Pyruvic Acid + 100  $\mu$ M L-Malic Acid  
 H2; H6; H10:  $\gamma$ -Amino-Butyric Acid + 100  $\mu$ M L-Malic Acid  
 H3; H7; H11:  $\alpha$ -Keto-Isocaproic Acid + 100  $\mu$ M L-Malic Acid  
 H4; H8; H12: L-Leucine + 100  $\mu$ M L-Malic Acid

Supplementary Fig. 3. The layout of MitoPlate S1. The raw kinetic curves exported of Data Analysis software 1.7. and the metabolic substrate types present in the microplate.

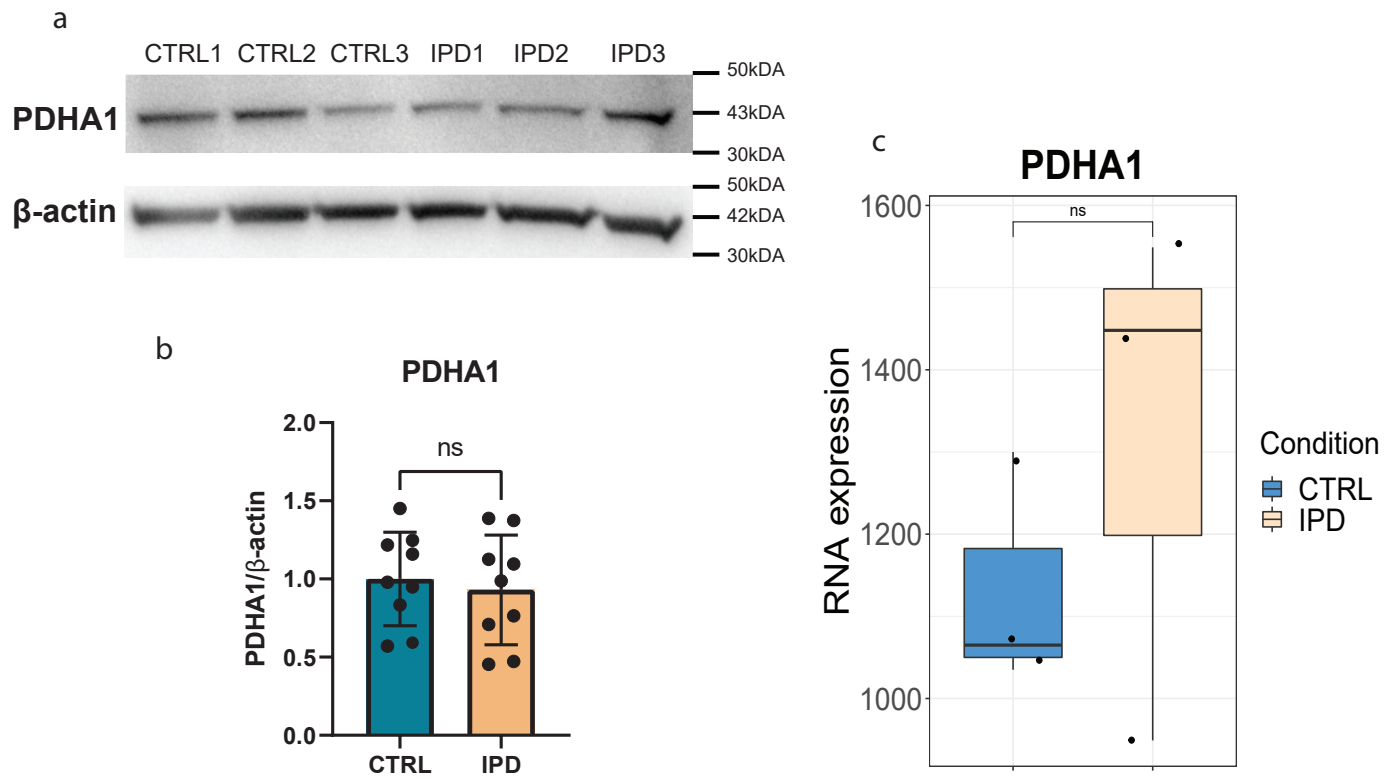

Supplementary Fig. 4. Quantification of PDHA1. a) A representative Western blot showing the expression of PDHA1 and  $\beta$ -actin. b) Quantification of protein expression detected by Western blot. Relative expression of PDHA1 normalized to the mean expression in control lines within each experiment (N=3). Error bars represent mean + SD. c) RNA expression of *PDHA1* from RNA sequencing analysis.



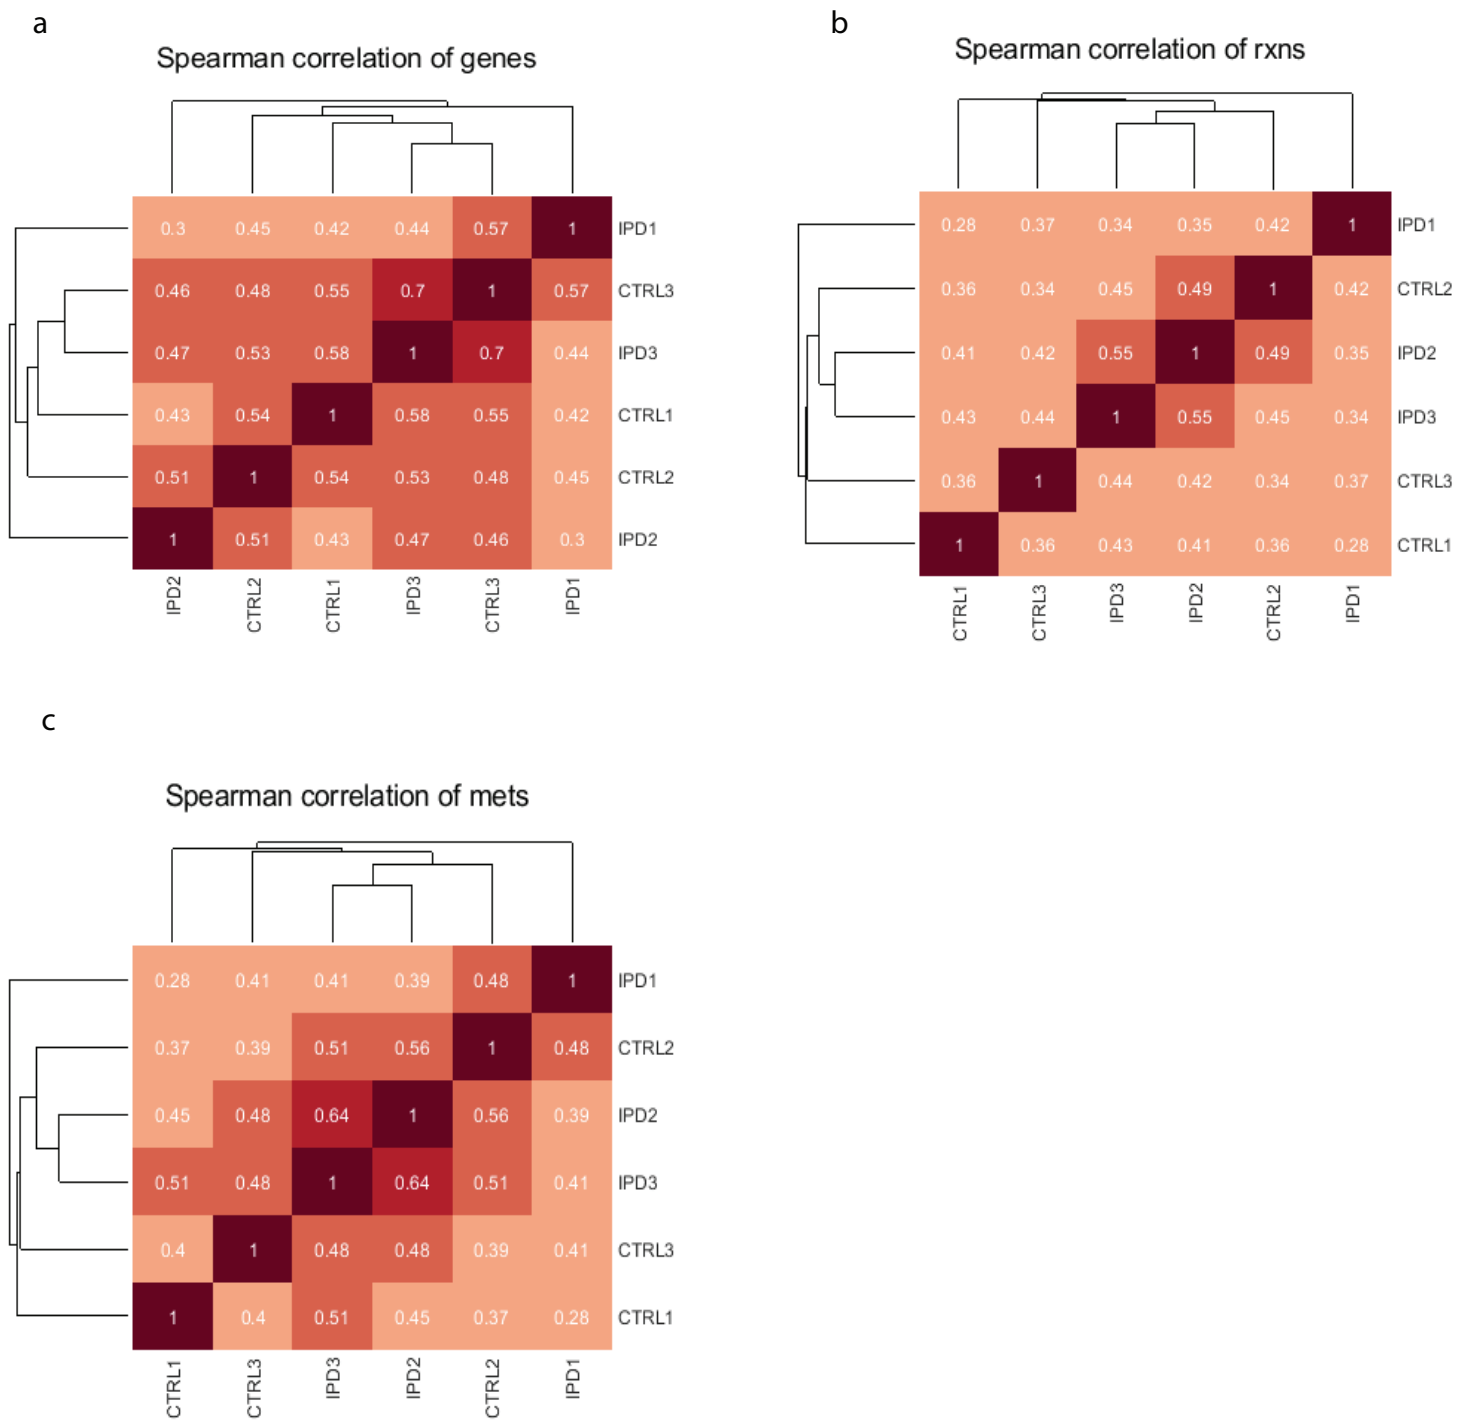

Supplementary Fig. 5. Metabolic modeling. a) Spearman correlation of genes present in the generated models. b) Spearman correlation of reactions present in the generated models. c) Spearman correlation of metabolites present in the generated models.

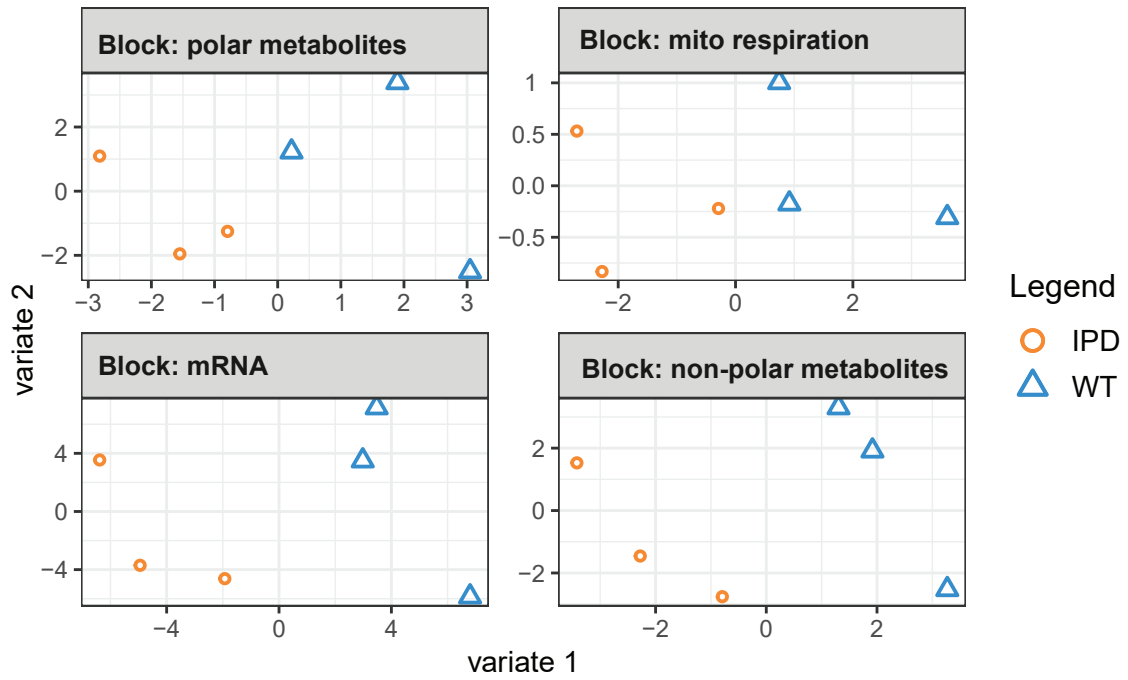

Supplementary Fig. 6. Integration analysis. Discriminant analysis of single datasets based on two dimensions (variate 1 and variate 2) of the top 10 polar and non-polar metabolites, top 50 genes and 6 mitochondrial respiration features.

$\beta$ -actin

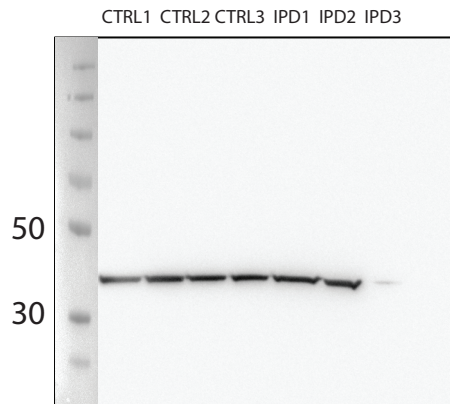

PDHA1

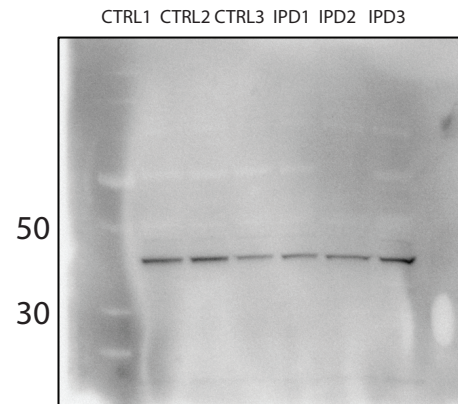

Supplementary Fig. 7. Western Blot scans for Supplementary Fig. 4 showing the protein abundance of  $\beta$ -actin and PDHA1. Size marker included for  $\beta$ -actin, since it was not visible on the membrane with the protein.
