# Supplementary material for: Omics data integration suggests a potential idiopathic Parkinson’s disease signature
Source: PubMed Central journal article supplement (PMC10662437; doi:10.1038/s42003-023-05548-w), 2023-11-20
Supplement: 42003_2023_5548_MOESM2_ESM.pdf [file 42003_2023_5548_MOESM2_ESM.pdf]

## Description of Additional Supplementary Files

**File name:** Supplementary Data 1

**Description:** Differentially expressed genes between IPD and CTRL

**File name:** Supplementary Data 2

**Description:** The top 50 metabolic reactions with the highest flux change between IPD and CTRL

**File name:** Supplementary Data 3

**Description:** Metabolic reactions involved in NAD metabolism

**File name:** Supplementary Data 4

**Description:** Mitochondrial reactions involving NAD

**File name:** Supplementary Data 5

**Description:** Cytosolic reactions involving NAD
