# Supplementary material for: Omics data integration suggests a potential idiopathic Parkinson’s disease signature
Source: PubMed Central journal article supplement (PMC10662437; doi:10.1038/s42003-023-05548-w), 2023-11-20
Supplement: 42003_2023_5548_MOESM8_ESM.pdf [file 42003_2023_5548_MOESM8_ESM.pdf]

## Reporting Summary

Nature Portfolio wishes to improve the reproducibility of the work that we publish. This form provides structure for consistency and transparency in reporting. For further information on Nature Portfolio policies, see our [Editorial Policies](#) and the [Editorial Policy Checklist](#).

### Statistics

For all statistical analyses, confirm that the following items are present in the figure legend, table legend, main text, or Methods section.

n/a Confirmed

- The exact sample size ( $n$ ) for each experimental group/condition, given as a discrete number and unit of measurement
- A statement on whether measurements were taken from distinct samples or whether the same sample was measured repeatedly
- The statistical test(s) used AND whether they are one- or two-sided  
*Only common tests should be described solely by name; describe more complex techniques in the Methods section.*
- A description of all covariates tested
- A description of any assumptions or corrections, such as tests of normality and adjustment for multiple comparisons
- A full description of the statistical parameters including central tendency (e.g. means) or other basic estimates (e.g. regression coefficient) AND variation (e.g. standard deviation) or associated estimates of uncertainty (e.g. confidence intervals)
- For null hypothesis testing, the test statistic (e.g.  $F$ ,  $t$ ,  $r$ ) with confidence intervals, effect sizes, degrees of freedom and  $P$  value noted  
*Give  $P$  values as exact values whenever suitable.*
- For Bayesian analysis, information on the choice of priors and Markov chain Monte Carlo settings
- For hierarchical and complex designs, identification of the appropriate level for tests and full reporting of outcomes
- Estimates of effect sizes (e.g. Cohen's  $d$ , Pearson's  $r$ ), indicating how they were calculated

*Our web collection on [statistics for biologists](#) contains articles on many of the points above.*

### Software and code

Policy information about [availability of computer code](#)

Data collection

Data analysis

For manuscripts utilizing custom algorithms or software that are central to the research but not yet described in published literature, software must be made available to editors and reviewers. We strongly encourage code deposition in a community repository (e.g. GitHub). See the Nature Portfolio [guidelines for submitting code & software](#) for further information.

### Data

Policy information about [availability of data](#)

All manuscripts must include a [data availability statement](#). This statement should provide the following information, where applicable:

- Accession codes, unique identifiers, or web links for publicly available datasets
- A description of any restrictions on data availability
- For clinical datasets or third party data, please ensure that the statement adheres to our [policy](#)

#### Data availability

All related data supporting the findings of this study is publicly available at DOI: <https://doi.org/10.17881/v8jg-pw83>. RNA sequencing data are deposited to the Gene Expression Omnibus database under accession number: GSE207088. Metabolomics data are deposited to the EMBL-EBI MetaboLights database with the

identifier MTBLS7740.

Code availability

All custom Matlab code for metabolic model generation and R scripts for data analysis and visualization are available on GitHub: [https://gitlab.lcsb.uni.lu/dvb/zagare\\_2022](https://gitlab.lcsb.uni.lu/dvb/zagare_2022).

## Research involving human participants, their data, or biological material

Policy information about studies with [human participants or human data](#). See also policy information about [sex, gender \(identity/presentation\), and sexual orientation](#) and [race, ethnicity and racism](#).

|                                                                    |                                                                                                                                                                                                                                          |
|--------------------------------------------------------------------|------------------------------------------------------------------------------------------------------------------------------------------------------------------------------------------------------------------------------------------|
| Reporting on sex and gender                                        | In this study we used human induced-pluripotent stem cell derived neuroepithelial stem cells from three female idiopathic Parkinson disease patients and age-gender matched healthy individuals.                                         |
| Reporting on race, ethnicity, or other socially relevant groupings | NA                                                                                                                                                                                                                                       |
| Population characteristics                                         | NA                                                                                                                                                                                                                                       |
| Recruitment                                                        | NA                                                                                                                                                                                                                                       |
| Ethics oversight                                                   | The work with iPSCs has been approved by the Ethics Review Panel (ERP) of the University of Luxembourg and the national Luxembourgish research ethics committee (CNER, Comité National d'Ethique de Recherche). CNER No. 201901/01; ivPD |

Note that full information on the approval of the study protocol must also be provided in the manuscript.

## Field-specific reporting

Please select the one below that is the best fit for your research. If you are not sure, read the appropriate sections before making your selection.

Life sciences  Behavioural & social sciences  Ecological, evolutionary & environmental sciences

For a reference copy of the document with all sections, see [nature.com/documents/nr-reporting-summary-flat.pdf](https://nature.com/documents/nr-reporting-summary-flat.pdf)

## Life sciences study design

All studies must disclose on these points even when the disclosure is negative.

|                 |                                                                                                                                                                                                    |
|-----------------|----------------------------------------------------------------------------------------------------------------------------------------------------------------------------------------------------|
| Sample size     | Sample size was based on the cell line availability. Three patient vs three healthy control cell lines                                                                                             |
| Data exclusions | Data was excluded based on outlier test ROUT. In the Seahorse mitochondrial assay data was excluded in case of failed response to the drugs.                                                       |
| Replication     | Metabolomics and RNA sequencing was performed once. Metabolomics included technical triplicates for each sample. All other experiments were performed at least from three different cell passages. |
| Randomization   | Three patient-derived cell lines were compared to three healthy individual derived cell lines.                                                                                                     |
| Blinding        | Metabolomics, RNA sequencing and model analysis was performed using sample identifiers that do not represent the healthy or patient group. In other experiments samples were not blinded           |

## Reporting for specific materials, systems and methods

We require information from authors about some types of materials, experimental systems and methods used in many studies. Here, indicate whether each material, system or method listed is relevant to your study. If you are not sure if a list item applies to your research, read the appropriate section before selecting a response.

## Materials &amp; experimental systems

## Methods

| n/a                                 | Involvement                                               |
|-------------------------------------|-----------------------------------------------------------|
| <input type="checkbox"/>            | <input checked="" type="checkbox"/> Antibodies            |
| <input type="checkbox"/>            | <input checked="" type="checkbox"/> Eukaryotic cell lines |
| <input checked="" type="checkbox"/> | <input type="checkbox"/> Palaeontology and archaeology    |
| <input checked="" type="checkbox"/> | <input type="checkbox"/> Animals and other organisms      |
| <input checked="" type="checkbox"/> | <input type="checkbox"/> Clinical data                    |
| <input checked="" type="checkbox"/> | <input type="checkbox"/> Dual use research of concern     |
| <input checked="" type="checkbox"/> | <input type="checkbox"/> Plants                           |

| n/a                                 | Involvement                                     |
|-------------------------------------|-------------------------------------------------|
| <input checked="" type="checkbox"/> | <input type="checkbox"/> ChIP-seq               |
| <input checked="" type="checkbox"/> | <input type="checkbox"/> Flow cytometry         |
| <input checked="" type="checkbox"/> | <input type="checkbox"/> MRI-based neuroimaging |

## Antibodies

|                 |                                                                                                                                                                                                                                                                                                                                                                                                                                                                                                                                                                                                                                                |
|-----------------|------------------------------------------------------------------------------------------------------------------------------------------------------------------------------------------------------------------------------------------------------------------------------------------------------------------------------------------------------------------------------------------------------------------------------------------------------------------------------------------------------------------------------------------------------------------------------------------------------------------------------------------------|
| Antibodies used | Pyruvate dehydrogenase rabbit (Cell Signaling Technology #3205; RRID:AB_2162926)<br>β-actin mouse primary antibody (Cell Signaling Technology #3700, RRID:AB_2242334)<br>SOX2 (R&D Systems #BAF2018; RRID:AB_356217)<br>PAX6 (Biolegend #901302; RRID: AB_2749901)<br>Nestin (BD Bioscience #611659; RRID:AB_399177)                                                                                                                                                                                                                                                                                                                           |
| Validation      | Pyruvate dehydrogenase: UniProt ID: P08559, validated in various cell lines, reference: Sargsyan et al., 2023, JCI Insight. doi:10.1172/jci.insight.153740.<br>β-actin: UniProt ID: P60709, validated in various cell lines, reference: Kiseleva et al., 2023, Nucleus.doi: 10.1080/19491034.2023.2165602.<br>SOX2: validated in human cells, reference: Graham, V. et al. (2003) Neuron 39:749.<br>PAX6: immunohistochemical staining validated in brain tissue, reference: Ahmad Z, et al. 2015. PLoS One. doi:1https://doi.org/10.1371/journal.pone.0144597.<br>Nestin: Knockout validation, reference: Cui et al., Nat Commun. 2016;7:1063 |

## Eukaryotic cell lines

Policy information about [cell lines and Sex and Gender in Research](#)

|                                                                   |                                                                                                                                                                    |
|-------------------------------------------------------------------|--------------------------------------------------------------------------------------------------------------------------------------------------------------------|
| Cell line source(s)                                               | The source of cell lines used in the study is Integrated Biobank of Luxembourg in collaboration with Max Planck Institute in Muenster. Sex:female                  |
| Authentication                                                    | Cell lines have been karyotyped                                                                                                                                    |
| Mycoplasma contamination                                          | Cell lines are tested negative for Mycoplasma. Or lab performs routinely Mycoplasma tests using LookOut® Mycoplasma PCR Detection Kit (Sigma, cat.no. MP0035-1KT). |
| Commonly misidentified lines (See <a href="#">ICLAC</a> register) | NA                                                                                                                                                                 |
